# Supplementary material
Source: publisher figshare collection journal article supplement (https://sage.figshare.com/ndownloader/files/21494862)
Supplement: Supplementary file 1 [file 21494862]

Archive with 4 entries (4 files):
- Appendix1__SAP.pdf
- Appendix3_HOMEX.pdf
- Appendix4_Blinded_interpretation.pdf
- Appendix2_SINEX.pdf
